# **Novel *bla*<sub>KPC</sub>-carrying species identified in the hospital environment**

Hang T.T. Phan<sup>\*1,2</sup>, Zoie Aiken<sup>3†</sup>, Oluwafemi Akinremi<sup>2,4</sup>, Julie Cawthorne<sup>3</sup>,

Andrew Dodgson<sup>3,4</sup>, Angela Downes<sup>3</sup>, Matthew Ellington<sup>2,5</sup>, Ryan George<sup>3</sup>, Amy

Mathers<sup>6</sup>, Nicole Stoesser<sup>1</sup>, Stephanie Thomas<sup>7</sup>, on behalf of the TRACE

Investigators' Group

Authors' affiliations:

<sup>1</sup>Nuffield Department of Clinical Medicine, University of Oxford, Oxford, United Kingdom

<sup>2</sup>NIHR Health Protection Research Unit in Healthcare Associated Infections and Antimicrobial Resistance at Oxford University

<sup>3</sup>Central Manchester University Hospitals NHS Foundation Trust, Oxford Road, Manchester, M13 9WL, UK

<sup>4</sup>Public Health England, London, UK

<sup>5</sup>Antimicrobial Resistance and Healthcare Associated Infections Reference Unit (AMRHAI), Public Health England, London, UK

<sup>6</sup>Division of Infectious Diseases and International Health, Department of Medicine, University of Virginia Health System, Charlottesville, Virginia, USA

<sup>7</sup>Department of Microbiology, University Hospital South Manchester

Running title: Novel *bla*<sub>KPC</sub>-carrying species

\*corresponding author

e-mail: [hang.phan@ndm.ox.ac.uk](mailto:hang.phan@ndm.ox.ac.uk)

---

† All authors except the first author are listed in alphabetical order

**Abstract (75/75 words)**

*bla*<sub>KPC</sub>, encoding one of five dominant global carbapenemase families, is increasingly identified in environmental species difficult to characterize using routine diagnostic methods, with epidemiological and clinical implications. During environmental hospital infection prevention and control investigations (Manchester, UK) we used whole genome sequencing to confirm species identification for isolates infrequently associated with *bla*<sub>KPC</sub> and/or difficult to classify by MALDI-ToF. Four previously undescribed *bla*<sub>KPC</sub>-carrying species were identified from the hospital environment, including a putative, novel *Enterobacter* species.

1 **Main text (1000/1000 words)**

2 Carbapenems are used to treat serious infections resistant to other antimicrobial  
3 agents. *Klebsiella pneumoniae* carbapenemases (KPC), encoded by *bla*<sub>KPC</sub> alleles , are  
4 a major carbapenemase family, conferring resistance to most beta-lactams. *bla*<sub>KPC</sub>,  
5 first identified retrospectively in *K. pneumoniae* dating from 1996, has since been  
6 observed in other Enterobacteriaceae, Pseudomonadaceae and *Acinetobacter* spp.[1].  
7 The host species range of *bla*<sub>KPC</sub> has not been defined, and may be more diverse than  
8 originally thought, given its presence in a number of environmental reservoirs[2-4].

9  
10 Accurate species identification is important for epidemiological and clinical reasons.  
11 Species identification methods (e.g. biochemical profiling, Matrix Assisted Laser  
12 Desorption Ionization Time-of-Flight [MALDI-ToF]), or partial sequence-based  
13 typing (e.g. 16S rRNA gene sequencing) can be inconsistent, particularly for  
14 Enterobacteriaceae[5, 6]. Whole genome sequencing (WGS) has an advantage over  
15 these methods in using the complete genetic content of an organism for  
16 identification[7].

17  
18 Here, WGS was used to confirm species identification of KPC-producers cultured  
19 during environmental infection prevention and control investigations undertaken on  
20 wards with KPC-positive patients in two hospitals in Manchester, UK (May 2012-  
21 March 2013, April 2015). High-touch surfaces, toilet edges and sinks were sampled  
22 with EZ-Reach sponges squeezed out into neutralizing buffer; water samples were  
23 collected from sink drain P-traps with plastic tubing and a syringe. Samples were  
24 centrifuged, and pellets sub-cultured overnight in tryptic soy broth (5mls) with  
25 ertapenem 10µg discs. Broths were sub-cultured on chromID CARBA plates

26 (bioMérieux, Marcy-l'Étoile, France); different Enterobacteriaceae colony  
 27 morphotypes were confirmed as *bla*<sub>KPC</sub> positive by PCR and species determined by  
 28 MALDI-ToF (Bruker, Billerica, Massachusetts, United States).  
 29  
 30 WGS was performed on 142 isolates from 55 samples using the Illumina HiSeq  
 31 platform (150bp, paired-end reads). *De novo* assemblies were created using SPAdes  
 32 3.6[8], and assessed for integrity using REAPR[9]. BLASTn-based analyses against  
 33 assemblies confirmed the presence of *bla*<sub>KPC</sub> in all 142 isolates.  
 34  
 35 Species identification was consistent by both MALDI-ToF and WGS for 78  
 36 *Klebsiella pneumoniae* isolates, 11 *Enterobacter cloacae*, five *Escherichia coli*, five  
 37 *Citrobacter freundii* and four *Klebsiella oxytoca*. However, limited sequence matches  
 38 with the NCBI nr reference database were observed for two isolates characterized as  
 39 *Escherichia vulneris* and/or *Enterobacter cancerogenus* by MALDI-ToF (9885\_1  
 40 [81% sequence similarity/58% coverage with the top match]; and 9885\_2  
 41 [84%/74%]), and 36 isolates characterized as *Pantoea agglomerans* by MALDI-ToF  
 42 (all closely genetically related; only 88%/85% coverage with the top match). In  
 43 addition, one isolate (1613625) was characterized as *Pluralibacter gergoviae* by  
 44 MALDI-ToF and had a good sequence match to the NCBI nr reference database;  
 45 however, this species had only been associated with *bla*<sub>KPC</sub> in two previous disease-  
 46 causing (i.e. not environmental) isolates (in Brazil and the USA)[10, 11]. We  
 47 therefore further investigated the species identification of isolates 9885\_1, 9885\_2,  
 48 9885\_4 (representative of the putative *P. agglomerans* group) and 1613625 using the  
 49 genomic data.

51 Querying the assemblies against the Silva 16S database[12](Table 1) demonstrated  
 52 that each isolate had several hits above the suggested threshold for 16S-based species  
 53 identification (>99.5% similarity). However, in all cases the first and second hits were  
 54 divergent. Species identification was therefore undertaken using genome-wide  
 55 average nucleotide identity (ANI) and alignment fraction (AF) scores, where ANI and  
 56 AF scores 96-96.5% and 0.6 respectively are considered species-specific thresholds[7,  
 57 13]. Sequence assemblies were first annotated with PROKKA[14] and coding  
 58 sequences were fed into the ANICalculator[13]. ANI scores for isolate assemblies and  
 59 top hit species found by 16S analysis (where available as reference genomes or  
 60 assemblies in GenBank; n=34) were calculated. These identified isolate 9885\_1 as  
 61 *vulneris*, 9885\_4 as *Pantoea anthophila*, 1613625 as *P. gergoviae*, and 9885\_2 as a  
 62 presumptive new *Enterobacter* species (Table 1).

63

64 We compared the genomes of these four isolates with those of closely related species  
 65 (n=34) using a core/pan-genome approach (ROARY)[15], and including only those  
 66 sub-groups with a core genome >200 core genes. For this analysis, contigs of plasmid  
 67 origin (high sequence similarity with plasmids in the NCBI nr database) were  
 68 excluded. A maximum likelihood phylogeny from core genome alignments was  
 69 reconstructed; the core genome phylogenies (Figure 1) concurred with the ANI results  
 70 and highlighted inconsistencies in traditional taxonomic assignments that are likely to  
 71 be revised as more bacterial genome sequences become available[16].

72

73 *E. vulneris* has been associated with both *Escherichia* and *Enterobacter* genera by  
 74 DNA hybridization[17], perhaps explaining the initial identification of 9885\_2 as  
 75 either *E. vulneris*/*E. cancerogenus* by MALDI-ToF. *E. vulneris* has been described in

76 wound infections, bacteraemia, peritonitis, urosepsis and meningitis[17-20], and its  
 77 novel association with *bla*<sub>KPC</sub> in this study is therefore potentially of clinical  
 78 significance. *Pantoea* spp. are recognized as opportunistic pathogens and whilst *P.*  
 79 *agglomerans* has been associated with *bla*<sub>KPC</sub> previously[21], *P.anthophila*, found in  
 80 lakes and diseased plants[22, 23], has not. Worryingly, in this survey, it was one of  
 81 the most widespread *bla*<sub>KPC</sub>-positive environmental species (36 isolates from 8 sites  
 82 from one ward, including clinical areas, staff areas and ward kitchens). *P. anthophila*  
 83 may represent a successful intermediate species for the wider transmission of *bla*<sub>KPC</sub>  
 84 amongst more pathogenic strains within/between non-clinical/clinical sites. *P.*  
 85 *gergoviae* has been isolated from a wide range of sources, including foodstuffs and  
 86 insects[24, 25], but has not previously been identified with *bla*<sub>KPC</sub> in environmental  
 87 isolates. Of particular concern is the organism's innate resistance to parabens,  
 88 enabling it to exist as a contaminant in a variety of personal care products, including  
 89 soaps and shampoos[25].

90

91 We have identified four species not previously associated with *bla*<sub>KPC</sub> in the hospital  
 92 environment, one a putative, novel *Enterobacter* sp. Accurate species identification of  
 93 *bla*<sub>KPC</sub>-carrying environmental isolates has implications for understanding the wider  
 94 reservoirs and transmission dynamics of this resistance gene family, assessing the  
 95 pathogenic potential of these organisms, and for accurate susceptibility testing in  
 96 isolates that have the potential to become clinically relevant. Although WGS is not  
 97 currently widely used in routine diagnostics, the development of bench-top  
 98 sequencers and falling costs may make this more feasible[26]. Species identification  
 99 can also be hampered by incomplete reference genome databases, which is being  
 100 addressed by the large-scale sequencing of type strain collections[27]. Our

101 identification of *bla*<sub>KPC</sub> in diverse species in the hospital environment supports  
 102 previous data suggesting that this reservoir plays a role in the dissemination of *bla*<sub>KPC</sub>  
 103 across species and genera[2].  
 104

#### 105 **Nucleotide sequence data**

106 These have been deposited in GenBank under project number PRJNA324191 , study  
 107 number SRP076320 and accession numbers SRR3654271, SRR3654272,  
 108 SRR3654273, SRR3654274.  
 109

#### 110 **ACKNOWLEDGEMENTS**

111 The Transmission of Carbapenemase-producing Enterobacteriaceae (TRACE) study  
 112 investigators are (alphabetical): Zoie Aiken, Oluwafemi Akinremi, Julie Cawthorne,  
 113 Paul Cleary, Derrick Crook, Valerie Decraene, Andrew Dodgson, Matthew Ellington,  
 114 Ryan George, Katie Hopkins, Rachel Jones, Cheryl Lenney, Amy Mathers, Ginny  
 115 Moore, Sarah Neilson, Tim Peto, Hang Phan, Mark Regan, Anna C. Seale, Nicole  
 116 Stoesser, Stephanie Thomas, Jay Turner-Gardner, Vicky Watts, Jimmy Walker, Sarah  
 117 Walker, David Wyllie, William Welfare and Neil Woodford.  
 118

119 We are grateful to the Infection Control Teams and Microbiology Laboratory staff at  
 120 the University Hospital of South Manchester NHS Foundation Trust and the Central  
 121 Manchester University Hospitals NHS Foundation Trust; the Sequencing hub at the  
 122 Wellcome Trust Center for Human Genetics, Oxford; and the Modernizing Medical  
 123 Microbiology Informatics Group (MMMIG), Oxford.  
 124

#### 125 **FUNDING**

126 The research was funded by the National Institute for Health Research Health  
127 Protection Research Unit (NIHR HPRU) in Healthcare Associated Infections and  
128 Antimicrobial Resistance at Oxford University in partnership with Public Health  
129 England (PHE). The views expressed are those of the author(s) and not necessarily  
130 those of the NHS, the NIHR, the Department of Health or Public Health England.

131

## 132 REFERENCES

- 133 1. Munoz-Price LS, Poirel L, Bonomo RA, Schwaber MJ, Daikos GL, Cormican  
134 M, Cornaglia G, Garau J, Gniadkowski M, Hayden MK, et al: **Clinical  
135 epidemiology of the global expansion of *Klebsiella pneumoniae*  
136 carbapenemases**. *Lancet Infect Dis* 2013, **13**:785-796.
- 137 2. Conlan S, Thomas PJ, Deming C, Park M, Lau AF, Dekker JP, Snitkin ES,  
138 Clark TA, Luong K, Song Y, et al: **Single-molecule sequencing to track  
139 plasmid diversity of hospital-associated carbapenemase-producing  
140 Enterobacteriaceae**. *Sci Transl Med* 2014, **6**:254ra126.
- 141 3. Xu G, Jiang Y, An W, Wang H, Zhang X: **Emergence of KPC-2-producing  
142 Escherichia coli isolates in an urban river in Harbin, China**. *World J  
143 Microbiol Biotechnol* 2015, **31**:1443-1450.
- 144 4. Montezzi LF, Campana EH, Correa LL, Justo LH, Paschoal RP, da Silva IL,  
145 Souza Mdo C, Drolshagen M, Picao RC: **Occurrence of carbapenemase-  
146 producing bacteria in coastal recreational waters**. *Int J Antimicrob Agents*  
147 2015, **45**:174-177.
- 148 5. Brady C, Cleenwerck I, Venter S, Coutinho T, De Vos P: **Taxonomic  
149 evaluation of the genus *Enterobacter* based on multilocus sequence  
150 analysis (MLSA): proposal to reclassify *E. nimipressuralis* and *E.***



- 151        **amnigenus into Lelliottia gen. nov. as Lelliottia nimipressuralis comb.**  
152        **nov. and Lelliottia amnigena comb. nov., respectively, E. gergoviae and E.**  
153        **pyrinus into Pluralibacter gen. nov. as Pluralibacter gergoviae comb. nov.**  
154        **and Pluralibacter pyrinus comb. nov., respectively, E. cowanii, E.**  
155        **radicincitans, E. oryzae and E. arachidis into Kosakonia gen. nov. as**  
156        **Kosakonia cowanii comb. nov., Kosakonia radicincitans comb. nov.,**  
157        **Kosakonia oryzae comb. nov. and Kosakonia arachidis comb. nov.,**  
158        **respectively, and E. turicensis, E. helveticus and E. pulveris into**  
159        **Cronobacter as Cronobacter zurichensis nom. nov., Cronobacter**  
160        **helveticus comb. nov. and Cronobacter pulveris comb. nov., respectively,**  
161        **and emended description of the genera Enterobacter and Cronobacter.**  
162        *Syst Appl Microbiol* 2013, **36**:309-319.
- 163    6.    Richter SS, Sercia L, Branda JA, Burnham CA, Bythrow M, Ferraro MJ,  
164        Garner OB, Ginocchio CC, Jennemann R, Lewinski MA, et al: **Identification**  
165        **of Enterobacteriaceae by matrix-assisted laser desorption/ionization time-**  
166        **of-flight mass spectrometry using the VITEK MS system.** *Eur J Clin*  
167        *Microbiol Infect Dis* 2013, **32**:1571-1578.
- 168    7.    Varghese NJ, Mukherjee S, Ivanova N, Konstantinidis KT, Mavrommatis K,  
169        Kyrpides NC, Pati A: **Microbial species delineation using whole genome**  
170        **sequences.** *Nucleic Acids Res* 2015, **43**:6761-6771.
- 171    8.    Bankevich A, Nurk S, Antipov D, Gurevich AA, Dvorkin M, Kulikov AS,  
172        Lesin VM, Nikolenko SI, Pham S, Prjibelski AD, et al: **SPAdes: a new**  
173        **genome assembly algorithm and its applications to single-cell sequencing.**  
174        *J Comput Biol* 2012, **19**:455-477.

- 175     9.     Hunt M, Kikuchi T, Sanders M, Newbold C, Berriman M, Otto TD: **REAPR:**  
176             **a universal tool for genome assembly evaluation.** *Genome Biol* 2013,  
177             **14**:R47.
- 178     10.     Almeida AC, de Castro KK, Fehlberg LC, Gales AC, Vilela MA, de Moraes  
179             MM: **Carbapenem-resistant *Enterobacter gergoviae* harbouring blaKPC-**  
180             **2 in Brazil.** *Int J Antimicrob Agents* 2014, **44**:369-370.
- 181     11.     Satlin MJ, Jenkins SG, Chen L, Helfgott D, Feldman EJ, Kreiswirth BN,  
182             Schuetz AN: **Septic shock caused by *Klebsiella pneumoniae***  
183             **carbapenemase-producing *Enterobacter gergoviae* in a neutropenic**  
184             **patient with leukemia.** *J Clin Microbiol* 2013, **51**:2794-2796.
- 185     12.     Quast C, Pruesse E, Yilmaz P, Gerken J, Schweer T, Yarza P, Peplies J,  
186             Glockner FO: **The SILVA ribosomal RNA gene database project:**  
187             **improved data processing and web-based tools.** *Nucleic Acids Res* 2013,  
188             **41**:D590-596.
- 189     13.     Goris J, Konstantinidis KT, Klappenbach JA, Coenye T, Vandamme P, Tiedje  
190             JM: **DNA-DNA hybridization values and their relationship to whole-**  
191             **genome sequence similarities.** *Int J Syst Evol Microbiol* 2007, **57**:81-91.
- 192     14.     Seemann T: **Prokka: rapid prokaryotic genome annotation.** *Bioinformatics*  
193             2014, **30**:2068-2069.
- 194     15.     Page AJ, Cummins CA, Hunt M, Wong VK, Reuter S, Holden MT, Fookes M,  
195             Falush D, Keane JA, Parkhill J: **Roary: rapid large-scale prokaryote pan**  
196             **genome analysis.** *Bioinformatics* 2015, **31**:3691-3693.
- 197     16.     Federhen S, Rossello-Mora R, Klenk H-P, Tindall BJ, Konstantinidis KT,  
198             Whitman WB, Brown D, Labeda D, Ussery D, Garrity GM, et al: **Meeting**

- 199            **report: GenBank microbial genomic taxonomy workshop (12–13 May,**  
200            **2015). *Standards in Genomic Sciences* 2016, **11**:15.**
- 201    17.    Brenner DJ, McWhorter AC, Knutson JK, Steigerwalt AG: **Escherichia**  
202            **vulneris: a new species of Enterobacteriaceae associated with human**  
203            **wounds. *J Clin Microbiol* 1982, **15**:1133-1140.**
- 204    18.    Senanayake SN, Jadeer A, Talaulikar GS, Roy J: **First reported case of**  
205            **dialysis-related peritonitis due to Escherichia vulneris. *J Clin Microbiol***  
206            **2006, **44**:4283-4284.**
- 207    19.    Awsare SV, Lillo M: **A case report of Escherichia vulneris urosepsis. *Rev***  
208            ***Infect Dis* 1991, **13**:1247-1248.**
- 209    20.    Mohanty S, Chandra SP, Dhawan B, Kapil A, Das BK: **Meningitis due to**  
210            **Escherichia vulneris. *Neurol India* 2005, **53**:122-123.**
- 211    21.    Tavares CP, Pereira PS, Marques EdA, Faria Jr C, de Souza MdPAH, de  
212            Almeida R, Alves CdFM, Asensi MD, Carvalho-Assef APDA: **Molecular**  
213            **epidemiology of KPC-2–producing Enterobacteriaceae (non–Klebsiella**  
214            **pneumoniae) isolated from Brazil. *Diagnostic Microbiology and Infectious***  
215            ***Disease* 2015, **82**:326-330.**
- 216    22.    Brady CL, Venter SN, Cleenwerck I, Engelbeen K, Vancanneyt M, Swings J,  
217            Coutinho TA: **Pantoea vagans sp. nov., Pantoea eucalypti sp. nov., Pantoea**  
218            **deleyi sp. nov. and Pantoea anthophila sp. nov. *Int J Syst Evol Microbiol***  
219            **2009, **59**:2339-2345.**
- 220    23.    Wan X, Hou S, Phan N, Malone Moss JS, Donachie SP, Alam M: **Draft**  
221            **Genome Sequence of Pantoea anthophila Strain 11-2 from Hypersaline**  
222            **Lake Laysan, Hawaii. *Genome Announc* 2015, **3**.**

- 223 24. Chan KG, Tee KK, Yin WF, Tan JY: **Complete Genome Sequence of**  
224 **Pluralibacter gergoviae FB2, an N-Acyl Homoserine Lactone-Degrading**  
225 **Strain Isolated from Packed Fish Paste.** *Genome Announc* 2014, **2**.
- 226 25. Periamé M, Pages JM, Davin-Regli A: **Enterobacter gergoviae adaptation**  
227 **to preservatives commonly used in cosmetic industry.** *Int J Cosmet Sci*  
228 2014, **36**:386-395.
- 229 26. Pankhurst LJ, Del Ojo Elias C, Votintseva AA, Walker TM, Cole K, Davies J,  
230 Fermont JM, Gascoyne-Binzi DM, Kohl TA, Kong C, et al: **Rapid,**  
231 **comprehensive, and affordable mycobacterial diagnosis with whole-**  
232 **genome sequencing: a prospective study.** *Lancet Respir Med* 2016, **4**:49-58.
- 233 27. Kyrpides NC, Hugenholtz P, Eisen JA, Woyke T, Goker M, Parker CT,  
234 Amann R, Beck BJ, Chain PS, Chun J, et al: **Genomic encyclopedia of**  
235 **bacteria and archaea: sequencing a myriad of type strains.** *PLoS Biol*  
236 2014, **12**:e1001920.
- 237

238 **Table 1.** Top 16S and genome wide species identification results of study *bla*<sub>KPC</sub>-positive isolates

| Isolate id | First hit species<br>(% identity)          | Second hit species<br>(% identity)          | Average nucleotide identity (ANI) species classification |                        |                                               | Final species<br>classification    |
|------------|--------------------------------------------|---------------------------------------------|----------------------------------------------------------|------------------------|-----------------------------------------------|------------------------------------|
|            |                                            |                                             | Best species match                                       | ANI<br>(bidirectional) | Alignment<br>Fraction (AF)<br>(bidirectional) |                                    |
| 9885_1     | <i>Escherichia<br/>vulneris</i> (99.74)    | <i>Enterobacter<br/>hormaechei</i> (99.73)  | <i>Escherichia vulneris</i>                              | 96.38 96.37            | 0.79 0.89                                     | <i>Escherichia<br/>vulneris</i>    |
| 9885_2     | <i>Citrobacter<br/>murlinae</i> (99.80)    | <i>Enterobacter<br/>asburiae</i> LI (99.42) | <i>Enterobacter sp MGH24</i>                             | 86.69 86.68            | 0.74 0.80                                     | Novel<br><i>Enterobacter sp.</i>   |
| 9885_4     | <i>Pantoea<br/>anthophila</i> (99.87)      | <i>Pantoea<br/>agglomerans</i> (99.87)      | <i>Pantoea anthophila</i>                                | 98.75 98.75            | 0.74 0.96                                     | <i>Pantoea<br/>anthophila</i>      |
| 1613625    | <i>Enterobacter sp.<br/>ETH-2</i> (100.00) | <i>Pluralibacter<br/>gergoviae</i> (99.81)  | <i>Pluralibacter gergoviae</i>                           | 98.91 98.91            | 0.90 0.89                                     | <i>Pluralibacter<br/>gergoviae</i> |

239

240 **Figure 1.** Core genome phylogenies of *bla*<sub>KPC</sub>-positive isolates investigated in detail  
241 in this study and of closely related reference genomes from NCBI/GenBank. (a)  
242 phylogeny of 9885\_1, 9885\_2 and 1613625 and reference *Enterobacter* spp.  
243 genomes; (b) phylogeny of 9885\_4 and reference *Pantoea* spp. genomes

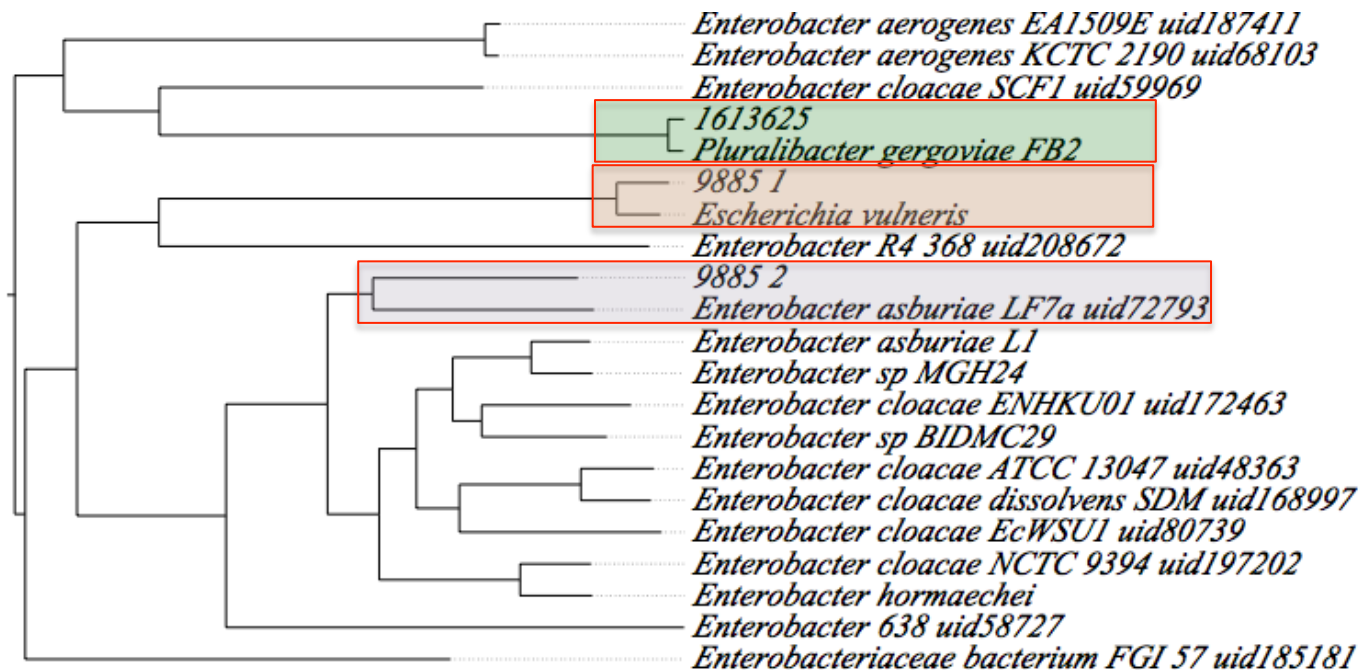

Core genes (99 ~100%): 203  
Soft core genes (95~ 99%): 56  
Shell genes (15~95%): 3,066  
Cloud genes (0~15%): 45,574  
Total genes: 48,899

(a)

Core genes (99 ~100%): 199  
Soft core genes (95~ 99%): 0  
Shell genes (15~95%): 10,545  
Cloud genes (0~15%): 10,453  
Total genes: 21,197

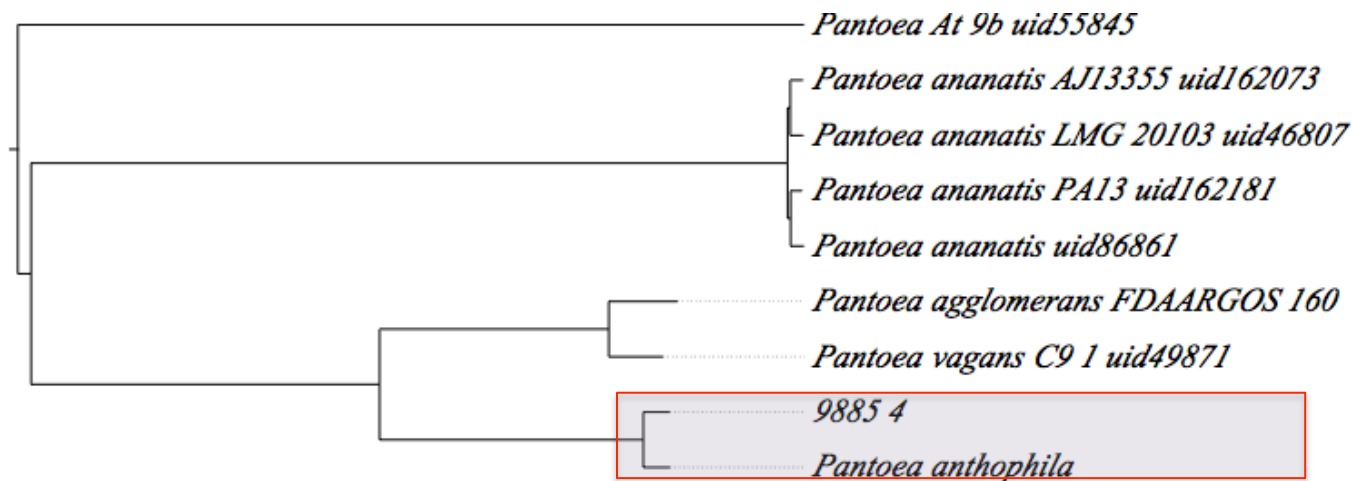

(b)
